# Supplementary material
Source: ML conference proceedings conference paper supplement (https://openreview.net/forum?id=whySRc6f5g_)
Supplement: supplementary_material [file attachment]

# CLARE-GAN: GENERATION OF CLASS-SPECIFIC TIME SERIES

**Anonymous authors**

Paper under double-blind review

## A APPENDIX

### A.1 IMPLEMENTATION DETAILS

We compare ClaRe-GAN to the state-of-the-art generative models C-RNN-GAN, RCGAN and TimeGAN. In order to enable a fair comparison between the algorithms, we use the same type and number of layer for the recurrent Generators and Discriminators: 2-layer LSTM with 100 hidden units. For ClaRe-GAN, 3 scales for the discriminator and  $\lambda_{GAN} = 1$ ,  $\lambda_{adv}^c = 1$ ,  $\lambda_c = 0.01$  and  $\lambda_{ms} = 1e - 5$ . To implement the existing methods, we use the publicly available codes:

- C-RNN-GAN <https://github.com/olofmogren/c-rnn-gan>
- RCGAN <https://github.com/ratschlab/RGAN>
- TimeGAN <https://github.com/jsyoon0823/TimeGAN>

It is to be noted that, we will also make our code available in case of acceptance. In the following, we present the time series for the different datasets and the t-sne results. For the conditional GANs, ClaRe-GAN and RCGAN, and for the real dataset we visualize the different classes separately.

Table 1: Summary of the characteristics of the used datasets. The datasets are publicly available in the UEA & UCR Time Series Classification Repository.

| <b>Dataset</b>      | <b>Length</b> | <b>Number of classes</b> | <b>Size</b> |
|---------------------|---------------|--------------------------|-------------|
| ItalyPowerDemand    | 24            | 2                        | 1096        |
| TwoLeadECG          | 82            | 2                        | 1192        |
| FreezerRegularTrain | 301           | 2                        | 2878        |
| Yoga                | 425           | 2                        | 3300        |
| DistalPhalanxTW     | 80            | 6                        | 539         |

### A.2 DISTALPHALANXTW RESULTS

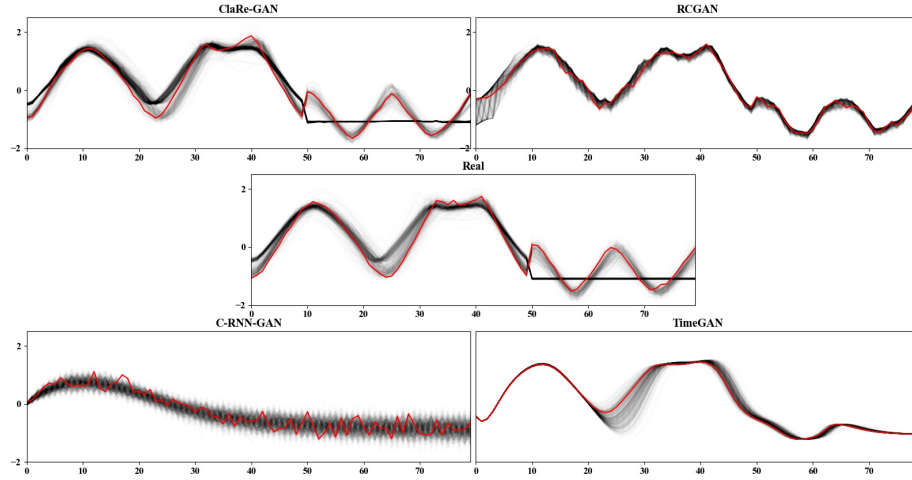

Figure 1: Illustration of the real and generated time series by ClaRe-GAN, RCGAN, C-RNN-GAN and TimeGAN for the DistalPhalanxTW dataset. The time series are depicted in black. The red line presents an example time-series for each subplot.

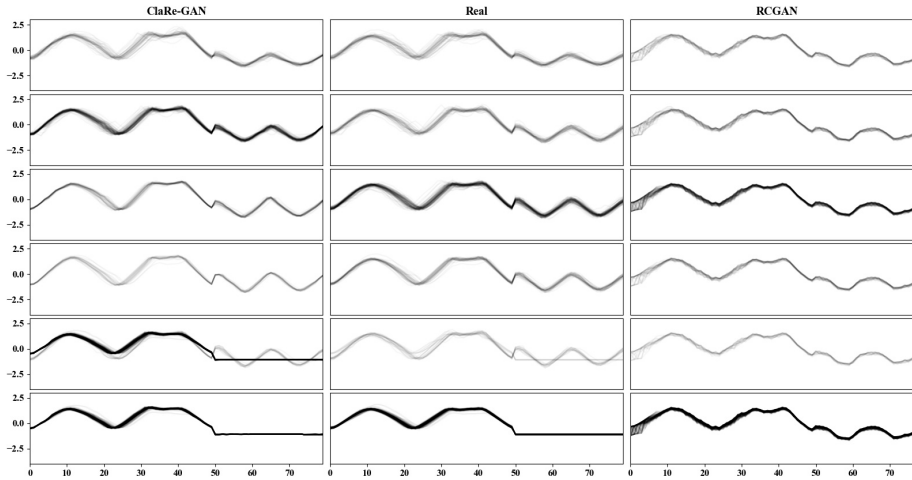

Figure 2: Illustration of the classes generated by ClaRe-GAN, the classes of the real dataset and the classes generated by RCGAN for the DistalPhalanxTW dataset.

## A.3 TWOLEADECG RESULTS

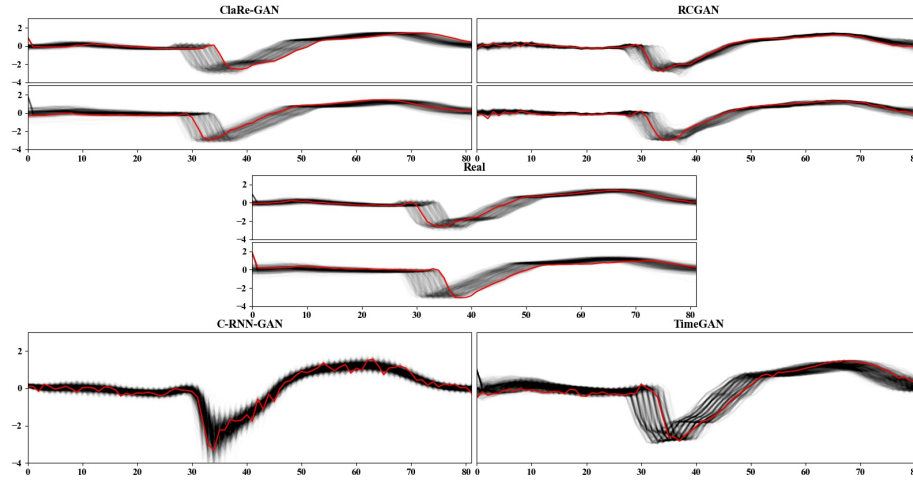

Figure 3: Illustration of the real and generated time series by ClaRe-GAN, RCGAN, C-RNN-GAN and TimeGAN for the TwoLeadECG dataset. The time series are depicted in black. The red line presents an example time-series for each subplot. For the conditional GANs, ClaRe-GAN and RCGAN, and the real dataset we visualize the time series of each class separately.

## A.4 ITALYPOWERDEMAND RESULTS

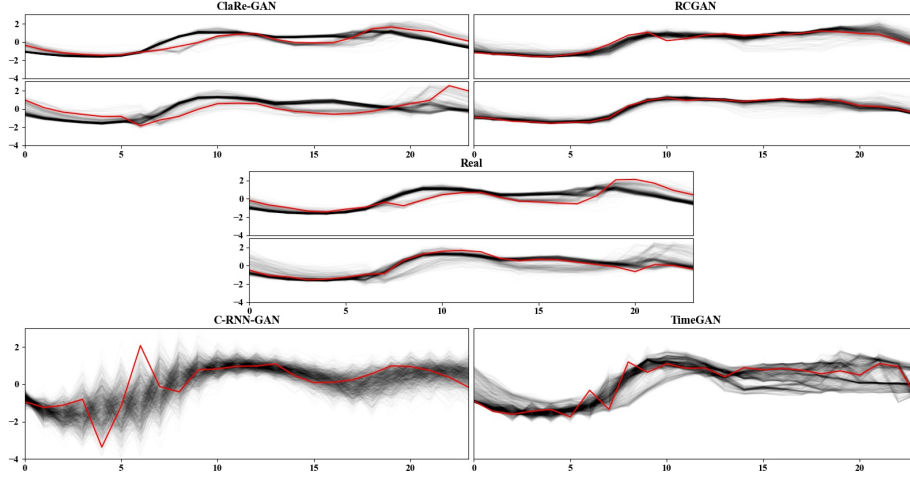

Figure 4: Illustration of the real and generated time series by ClaRe-GAN, RCGAN, C-RNN-GAN and TimeGAN for the ItalyPowerDemand dataset. The time series are depicted in black. The red line presents an example time-series for each subplot. For the conditional GANs, ClaRe-GAN and RCGAN, and the real dataset we visualize the time series of each class separately.

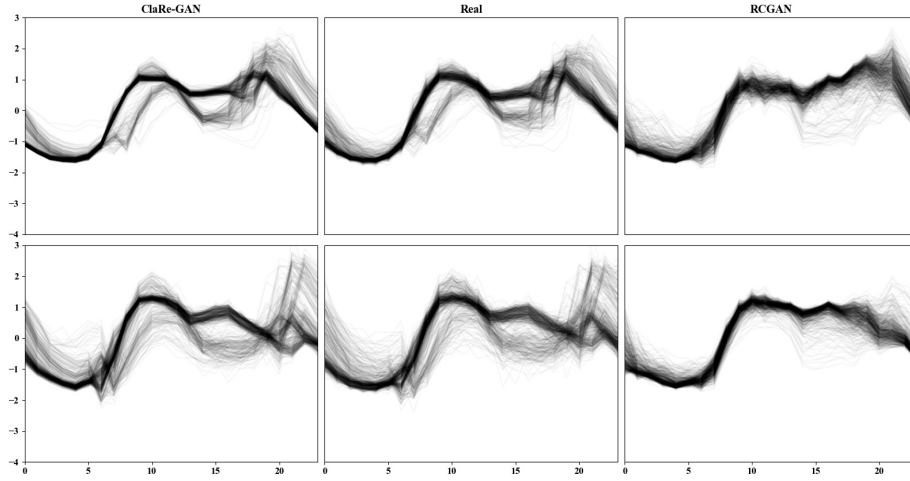

Figure 5: Illustration of the classes generated by ClaRe-GAN, the classes of the real dataset and the classes generated by RCGAN for the ItalyPowerDemand dataset.

## A.5 FREEZERREGULARTRAIN RESULTS

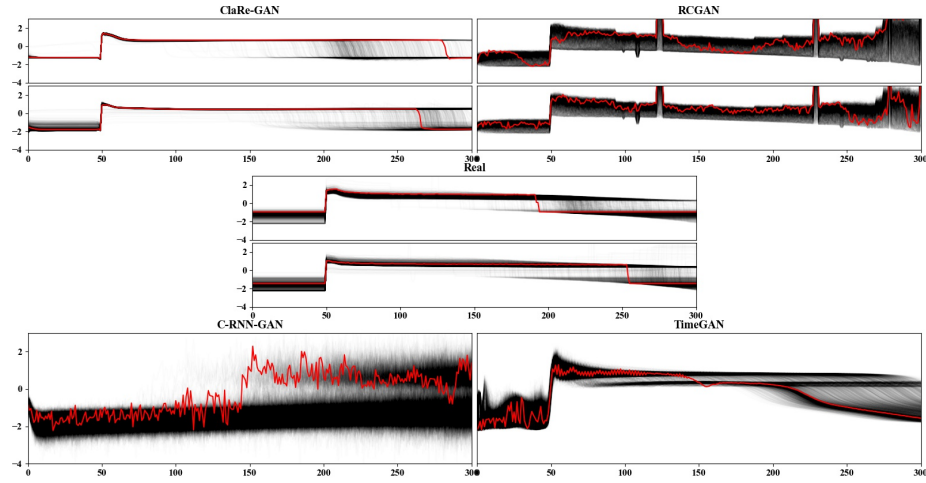

Figure 6: Illustration of the real and generated time series by ClaRe-GAN, RCGAN, C-RNN-GAN and TimeGAN for the FreezerRegularTrain dataset. The time series are depicted in black. The red line presents an example time-series for each subplot. For the conditional GANs, ClaRe-GAN and RCGAN, and the real dataset we visualize the time series of each class separately.

## A.6 T-SNE RESULTS

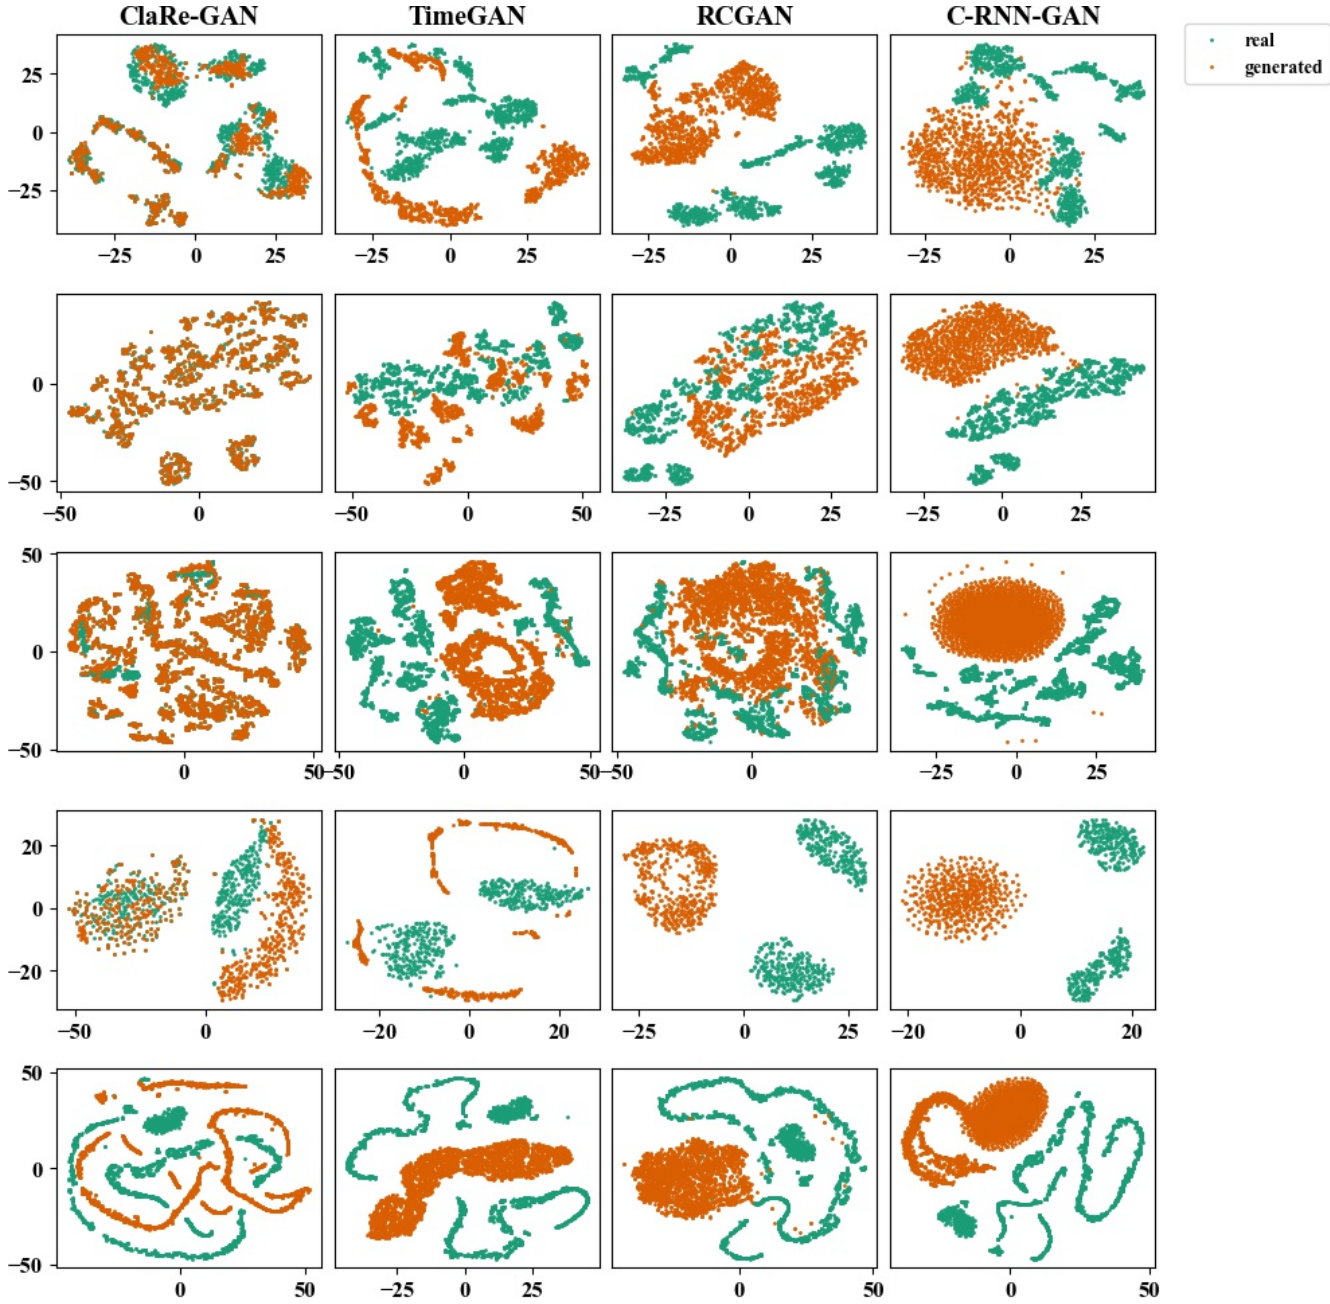

Figure 7: Comparison of the real (depicted in green) and generated (depicted in orange) dataset with PCA. Each row corresponds to a specific dataset and each column to a method. The results are presented in the following order (top to bottom): ItalyPowerDemand, TwoLeadECG, Yoga, DistalPhalanxTW and FreezerRegularTrain.
